# Supplementary material for: (-)-Englerin-A Has Analgesic and Anti-Inflammatory Effects Independent of TRPC4 and 5
Source: MDPI journal article supplement (doi:10.3390/ijms22126380), 2021-06-15
Supplement: s1 [file s1]

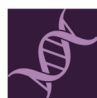

## Supplementary material

**Table S1.** Summary of mechanical paw withdrawal thresholds measured at baseline and at 2 and 4 hours after intra-plantar injections of carrageenan in the left hindpaw.

| Time (h) | Vehicle         |             |  | EA (2 mg/kg)    |             |            | EA (4 mg/kg)    |             |            |
|----------|-----------------|-------------|--|-----------------|-------------|------------|-----------------|-------------|------------|
|          | Mean $\pm$ SEM  | vs baseline |  | Mean $\pm$ SEM  | vs baseline | vs vehicle | Mean $\pm$ SEM  | vs baseline | vs vehicle |
| 0        | 0.88 $\pm$ 0.07 | -           |  | 0.94 $\pm$ 0.02 | -           | >.999      | 0.98 $\pm$ 0.02 | -           | 1.00       |
| 2        | 0.19 $\pm$ 0.07 | <.001       |  | 0.42 $\pm$ 0.14 | 0.00        | 0.58       | 0.68 $\pm$ 0.10 | 0.28        | 0.01       |
| 4        | 0.11 $\pm$ 0.02 | <.001       |  | 0.25 $\pm$ 0.11 | <.001       | 0.96       | 0.96 $\pm$ 0.55 | 0.03        | 0.02       |

**Table S2.** Summary of thermal paw withdrawal thresholds measured at baseline and at 1 and 3 hours after intra-plantar injections of carrageenan in the left hindpaw.

| Time (h) | Vehicle         |             |  | EA (2 mg/kg)    |             |            | EA (4 mg/kg)    |             |            |
|----------|-----------------|-------------|--|-----------------|-------------|------------|-----------------|-------------|------------|
|          | Mean $\pm$ SEM  | vs baseline |  | Mean $\pm$ SEM  | vs baseline | vs vehicle | Mean $\pm$ SEM  | vs baseline | vs vehicle |
| 0        | 9.48 $\pm$ 0.98 | -           |  | 8.01 $\pm$ 0.38 | -           | 0.86       | 8.61 $\pm$ 1.44 | -           | 0.99       |
| 1        | 5.84 $\pm$ 0.98 | 0.04        |  | 6.97 $\pm$ 1.32 | 0.98        | 0.96       | 9.84 $\pm$ 0.93 | 0.94        | 0.02       |
| 3        | 4.83 $\pm$ 0.81 | 0.00        |  | 6.26 $\pm$ 0.92 | 0.71        | 0.88       | 4.79 $\pm$ 0.29 | 0.02        | >0.99      |

**Table S3.** Summary of thermal paw withdrawal thresholds measured at baseline and at 1 and 3 hours after intra-plantar injections of carrageenan in the left hindpaw.

| Time (h) | Vehicle         |             |  | EA (2 mg/kg)    |             |            |
|----------|-----------------|-------------|--|-----------------|-------------|------------|
|          | Mean $\pm$ SEM  | vs baseline |  | Mean $\pm$ SEM  | vs baseline | vs vehicle |
| 0        | 7.98 $\pm$ 0.06 | -           |  | 7.82 $\pm$ 0.07 | -           | 0.9949     |
| 1        | 4.46 $\pm$ 0.40 | <0.0001     |  | 4.71 $\pm$ 0.32 | <0.0001     | 0.9696     |
| 3        | 3.58 $\pm$ 0.23 | <0.0001     |  | 6.41 $\pm$ 0.18 | 0.0154      | <0.0001    |

**Supplementary table 4:** Summary of mechanical paw withdrawal thresholds measured at baseline and at 2 and 4 hours after intra-plantar injections of carrageenan in the left hindpaw.

| Time (h) | WT Vehicle      |             |  | WT EA           |             |            | TRPC5 KO Vehicle |             |            | TRPC5 KO EA     |             |            |
|----------|-----------------|-------------|--|-----------------|-------------|------------|------------------|-------------|------------|-----------------|-------------|------------|
|          | Mean $\pm$ SEM  | vs baseline |  | Mean $\pm$ SEM  | vs baseline | vs vehicle | Mean $\pm$ SEM   | vs baseline | vs vehicle | Mean $\pm$ SEM  | vs baseline | vs vehicle |
| 0        | 1.00 $\pm$ 0.01 | -           |  | 0.98 $\pm$ 0.02 | -           | >.999      | 0.99 $\pm$ 0.01  | -           | >.999      | 0.98 $\pm$ 0.01 | -           | >.999      |
| 2        | 0.46 $\pm$ 0.11 | <.001       |  | 0.98 $\pm$ 0.02 | >.999       | <.001      | 0.43 $\pm$ 0.09  | <.001       | >.999      | 0.87 $\pm$ 0.06 | 0.972       | 0.001      |
| 4        | 0.20 $\pm$ 0.04 | <.001       |  | 0.60 $\pm$ 0.13 | 0.003       | 0.002      | 0.22 $\pm$ 0.07  | <.001       | >.999      | 0.88 $\pm$ 0.06 | 0.992       | <.001      |

**Supplementary table 5:** Summary of thermal paw withdrawal thresholds measured at baseline and at 1 and 3 hours after intra-plantar injections of carrageenan in the left hindpaw.

| Time (h) | WT Vehicle      |             |  | WT EA           |             |            | TRPC5 KO Vehicle |             |            | TRPC5 KO EA     |             |            |
|----------|-----------------|-------------|--|-----------------|-------------|------------|------------------|-------------|------------|-----------------|-------------|------------|
|          | Mean $\pm$ SEM  | vs baseline |  | Mean $\pm$ SEM  | vs baseline | vs vehicle | Mean $\pm$ SEM   | vs baseline | vs vehicle | Mean $\pm$ SEM  | vs baseline | vs vehicle |
| 0        | 9.70 $\pm$ 0.73 | -           |  | 8.58 $\pm$ 0.47 | -           | 1.00       | 9.50 $\pm$ 0.93  | -           | >0.9999    | 8.32 $\pm$ 0.99 | -           | 1.00       |
| 2        | 5.45 $\pm$ 1.14 | 0.11        |  | 9.26 $\pm$ 1.42 | >0.9999     | 0.21       | 7.11 $\pm$ 0.82  | 0.83        | 0.98       | 9.21 $\pm$ 1.13 | >0.9999     | 0.23       |
| 4        | 4.75 $\pm$ 0.95 | 0.03        |  | 7.15 $\pm$ 0.98 | 1.00        | 0.82       | 4.28 $\pm$ 0.59  | 0.04        | >0.9999    | 6.85 $\pm$ 1.70 | 0.99        | 0.92       |

**Supplementary table 6: Summary of mechanical paw withdrawal thresholds measured at baseline and at 2 and 4 hours after intra-plantar injections of carrageenan in the left hindpaw.**

| Time (h) | Veh+Veh         |             |  | Veh+EA          |             |            | ML204+Veh       |             |            | ML204+EA        |             |            |
|----------|-----------------|-------------|--|-----------------|-------------|------------|-----------------|-------------|------------|-----------------|-------------|------------|
|          | Mean $\pm$ SEM  | vs baseline |  | Mean $\pm$ SEM  | vs baseline | vs vehicle | Mean $\pm$ SEM  | vs baseline | vs vehicle | Mean $\pm$ SEM  | vs baseline | vs vehicle |
| 0        | 0.99 $\pm$ 0.01 | -           |  | 0.96 $\pm$ 0.04 | -           | >.999      | 0.98 $\pm$ 0.04 | -           | >.999      | 0.96 $\pm$ 0.03 | -           | >.999      |
| 2        | 0.38 $\pm$ 0.17 | <.001       |  | 0.86 $\pm$ 0.11 | 1.00        | 0.00       | 0.53 $\pm$ 0.07 | 0.01        | 0.95       | 0.72 $\pm$ 0.05 | 0.45        | 0.11       |
| 4        | 0.28 $\pm$ 0.06 | <.001       |  | 0.79 $\pm$ 0.12 | 0.89        | 0.00       | 0.28 $\pm$ 0.05 | <.001       | >.999      | 0.54 $\pm$ 0.11 | 0.02        | 0.40       |

**Supplementary table 7: Summary of thermal paw withdrawal thresholds measured at baseline and at 1 and 3 hours after intra-plantar injections of carrageenan in the left hindpaw.**

| Time (h) | Veh+Veh         |             |  | Veh+EA           |             |            | ML204+Veh       |             |            | ML204+EA         |             |            |
|----------|-----------------|-------------|--|------------------|-------------|------------|-----------------|-------------|------------|------------------|-------------|------------|
|          | Mean $\pm$ SEM  | vs baseline |  | Mean $\pm$ SEM   | vs baseline | vs vehicle | Mean $\pm$ SEM  | vs baseline | vs vehicle | Mean $\pm$ SEM   | vs baseline | vs vehicle |
| 0        | 8.19 $\pm$ 0.74 | -           |  | 7.67 $\pm$ 1.06  | -           | >0.9999    | 9.37 $\pm$ 2.58 | -           | >0.9999    | 6.86 $\pm$ 0.84  | -           | 1.00       |
| 2        | 6.83 $\pm$ 0.65 | 1.00        |  | 10.69 $\pm$ 1.89 | 0.88        | 0.62       | 5.77 $\pm$ 0.89 | 0.71        | >0.9999    | 11.41 $\pm$ 1.23 | 0.40        | 0.39       |
| 4        | 4.45 $\pm$ 1.24 | 0.67        |  | 8.04 $\pm$ 1.72  | >0.9999     | 0.72       | 4.34 $\pm$ 1.47 | 0.26        | >0.9999    | 7.00 $\pm$ 3.07  | >0.9999     | 0.96       |

**Supplementary table 8: Summary of dose-response curve of cultured primary sensory neurons from WT and KO mice to increasing concentration of Englerin-A.**

| Englerin-A concentration (nM) | WT                   | TRPC5 KO          |
|-------------------------------|----------------------|-------------------|
| 0.1                           | 0.00                 | 0.00              |
| 0.3                           | 10.04 $\pm$ 6.17     | 3.67 $\pm$ 9.17   |
| 1                             | 21.20 $\pm$ 8.26     | 23.81 $\pm$ 0.39  |
| 3                             | 30.49 $\pm$ 15.98.17 | 26.66 $\pm$ 11.87 |
| 10                            | 53.48 $\pm$ 1.90     | 52.12 $\pm$ 3.80  |
| 30                            | 79.80 $\pm$ 9.00     | 85.07 $\pm$ 6.86  |
| 100                           | 76.41 $\pm$ 6.50     | 81.75 $\pm$ 15.64 |
